# Supplementary material
Source: publisher figshare collection journal article supplement (https://acs.figshare.com/ndownloader/files/4220977)
Supplement: Supplementary file 1 [file 4220977]

# Supporting Information

## High Resolution Separation of Graphene Oxide by Capillary Electrophoresis

GO sheets normally carry with negative charge (pH > 4) due to the dissociation of carboxylic groups:

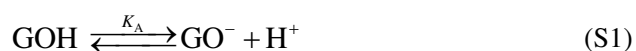

and

$$K_A = \frac{[\text{GO}^-][\text{H}^+]_{\text{local}}}{[\text{GOH}]} \quad (\text{S2})$$

The local concentration and the bulk concentration of proton can be found with the help of the Boltzmann factor ( $k_B$ ):

$$[\text{H}^+]_{\text{local}} = [\text{H}^+] \cdot e^{-\frac{e\psi_0}{k_B T}} \quad (\text{S3})$$

We have the surface potential of  $\psi_0$ <sup>1</sup>

$$\psi_0 = 2.30 \cdot \frac{RT}{F_A} \cdot (\text{p}K_A - \text{pH}) + 2.30 \cdot \frac{RT}{F_A} \cdot \log \frac{[\text{GO}^-]}{[\text{GOH}]} \quad (\text{S4})$$

The surface charge density ( $\sigma$ ) was obtained according to Grahame equation:

$$\sigma = \frac{4\epsilon_0\epsilon_R k_B T \kappa}{e} \sinh \frac{e\psi_0}{2k_B T} \quad (\text{S5})$$

where  $\epsilon_0$ ,  $\epsilon_R$  are dielectric permittivity coefficients of the vacuum and solution system, respectively.  $\kappa$  is the inverse of Debye length ( $\lambda_D$ ) of surface potential

$$\lambda_D = \frac{1}{\sqrt{\frac{e^2}{\epsilon\epsilon_0 k_B T} \sum_i c_i^0 Z_i^2}} = \kappa^{-1} \quad (\text{S6})$$

When the surface potential was low ( $\psi_0 < 50$  mV), eq 5 can be simplified as<sup>1</sup>:

$$\sigma = \frac{2\epsilon\epsilon_0\psi_0}{\lambda_D} \quad (\text{S7})$$

So surface charged GO sheets can be described as a flat slab with two faces using theory of electric double layer.

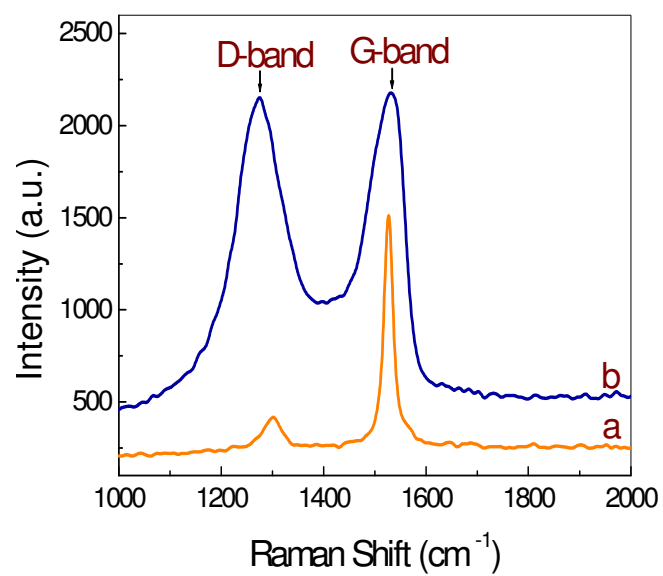

**Figure S1.** Raman spectra of graphite (a) and graphene oxide (b). These spectra are obtained with  $E_{\text{laser}} = 2.41\text{eV}$  (514 nm).

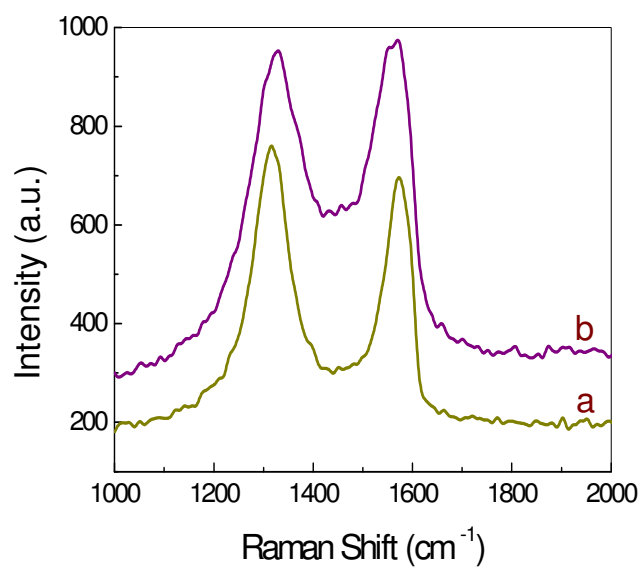

**Figure S2.** Raman spectra taken at 514nm of GO fractionations obtained at the anode (a) and the cathode (b), respectively.

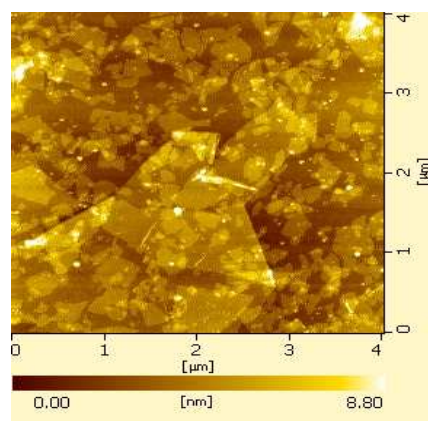

**Figure S3.** AFM image of the GO sample used for the separation study. The sample is polydisperse with sizes varying from a few nanometers to micrometers.

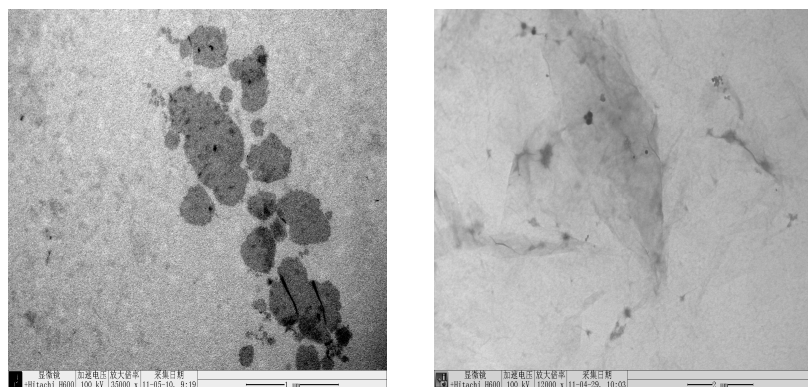

**Figure S4.** TEM images of the GO sample obtained at the anode (left) and cathode (right), respectively.

## Reference

- (1) Butt, H.-J.; Graf, K.; Kappl, M.; WILEY-VCH Verlag GmbH & Co. KGaA: Weinheim, 2003.
